# Supplementary material for: Enhanced surface functionalization of 2D molybdenum/tin chalcogenide nanostructures for effective SERS detection of Escherichia coli
Source: PubMed Central journal article supplement (PMC11533536; doi:10.1039/d4ra05315j), 2024-11-04
Supplement: RA-014-D4RA05315J-s001.pdf [file RA-014-D4RA05315J-s001.pdf]

## Enhanced Surface Functionalization of 2D Molybdenum/Tin Chalcogenide Nanostructures for Effective SERS Detection of *Escherichia coli*

Zainab Ishfaq<sup>a</sup>, Layla A. Almutairi<sup>b</sup>, M. Yasir Ali<sup>a</sup>, Salhah Hamed Alrefaee<sup>c</sup>, Mohamed Abdelsabour Fahmy<sup>d, e</sup>, Elsammani Ali Shokralla<sup>f</sup>, Lamiaa G. Alharbe<sup>g</sup>, Adnan Ali<sup>a\*</sup>, Arslan Ashfaq<sup>a\*</sup>, A.R. Abd-Elwahed<sup>h, i</sup>

<sup>a</sup>Department of Physics, Government College University, Faisalabad, 38000, Pakistan

<sup>b</sup>Department of Biology, College of Science Princess Nourah bint Abdulrahman University, P.O. Box 84428, Riyadh 11671, Saudi Arabia

<sup>c</sup>Department of Chemistry, Faculty of Science, Taibah University, Yanbu 30799, Saudi Arabia

<sup>d</sup>Adham University College, Umm Al-Qura University, Adham 28653, Makkah, Saudi Arabia

<sup>e</sup>Faculty of Computers and Informatics, Suez Canal University, New Campus, 41522 Ismailia, Egypt

<sup>f</sup>Department of Physics, Faculty of Science, Al-Baha University, Alaqiq, 65779-7738, Saudi Arabia

<sup>g</sup>Department of Physics, Aljamoum University College, Umm Al-Qura University, Makkah, Saudi Arabia

<sup>h</sup>Department of Physics, College of Science, Qassim University, Buraydah 51452, Saudi Arabia

Corresponding Authors\*: [arslan.ashfaq201@gmail.com](mailto:arslan.ashfaq201@gmail.com) (Arslan Ashfaq)

[adnnan\\_1982@yahoo.com](mailto:adnnan_1982@yahoo.com) (Adnan Ali)

### Supplementary data

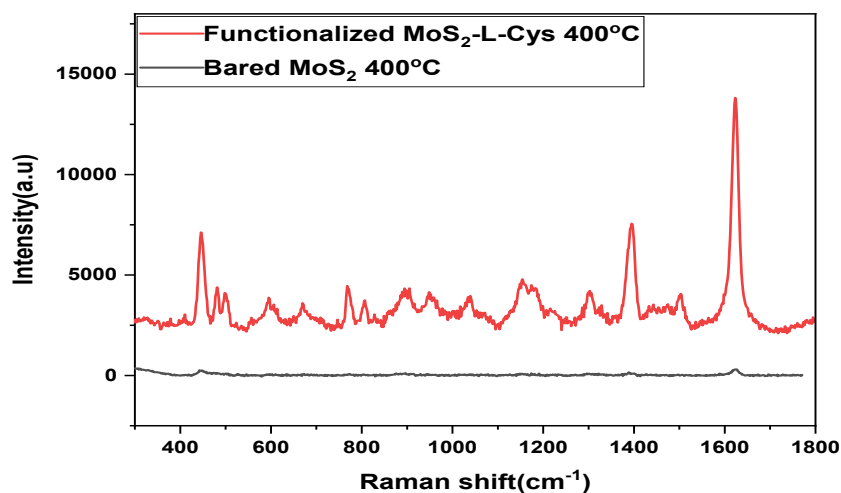

Figure S1. The Comparative Raman spectrum of SERs enhancement of beard particles of MoS<sub>2</sub> and functionalized particles of MoS<sub>2</sub>-L-Cys by using MB annealed at 400°C.

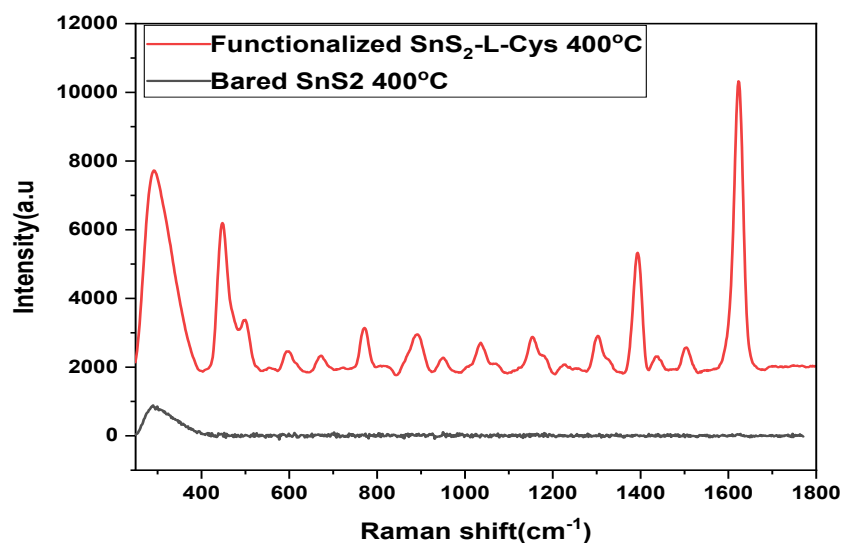

Figure S2. The Comparative Raman spectrum of SERs enhancement of beard particles of SnS<sub>2</sub> and functionalized particles of SnS<sub>2</sub>-L-Cys by using MB annealed at 400°C.

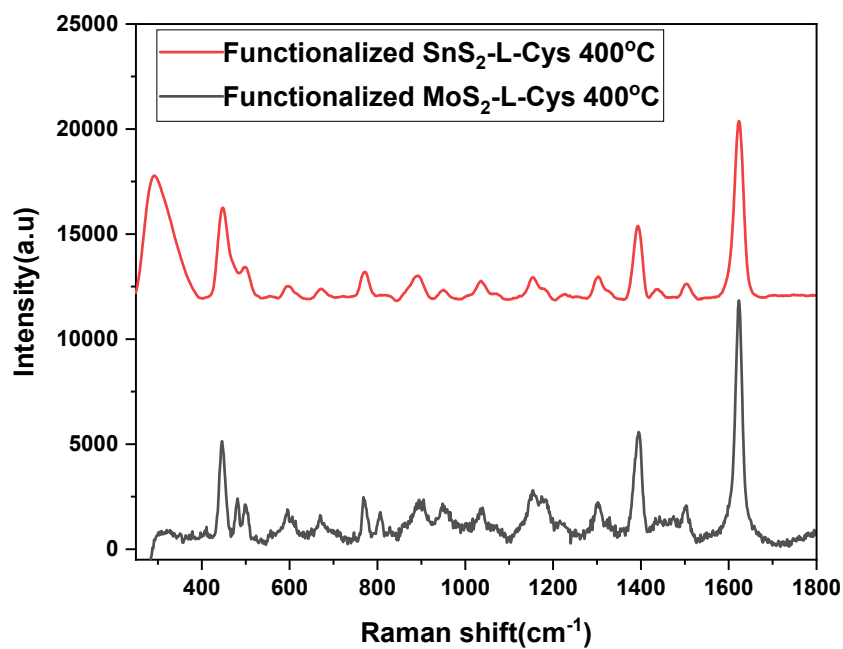

Figure S3. The Comparative Raman spectrum of SERs enhancement of functionalized particles of MoS<sub>2</sub>-L-Cys and SnS<sub>2</sub>-L-Cys by using MB annealed at 400°C.
